# Supplementary material
Source: Springer Nature journal article supplement (https://www.springermedizin.de/resource/supplementary/12936_2005_148_MOESM2_ESM.pdf/9546996)

Morbidity from severe malaria

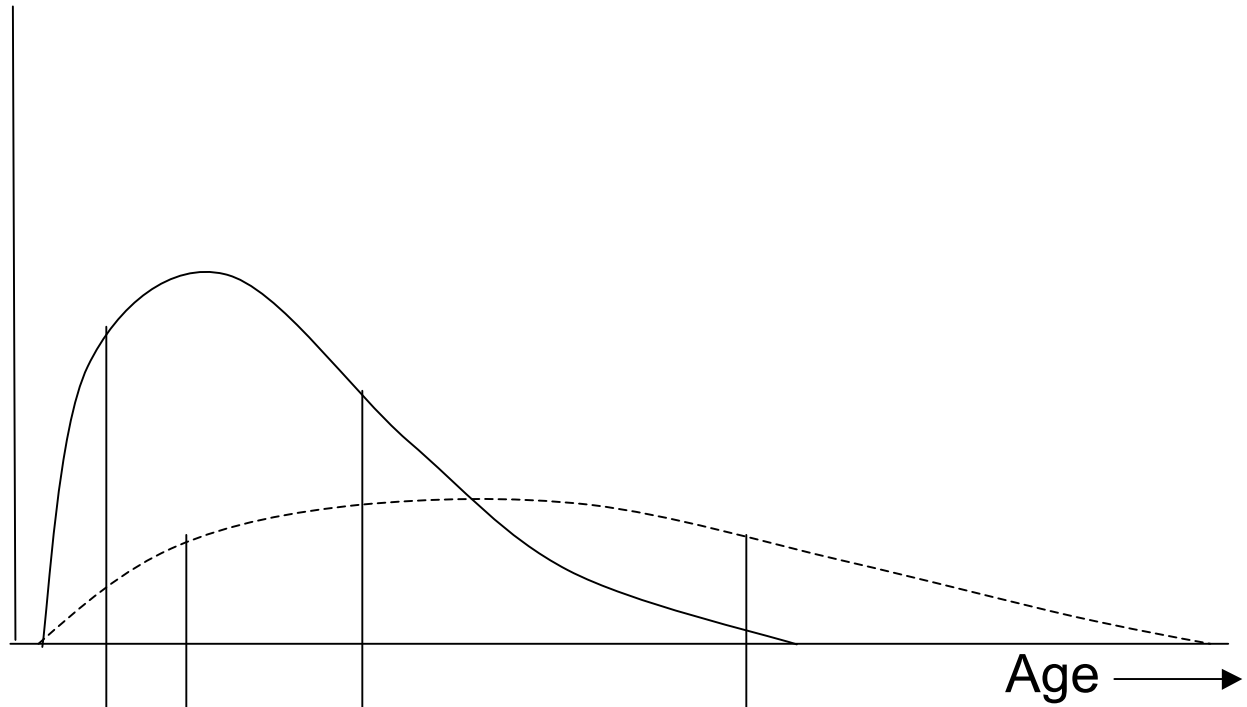

Age →

“Window of greatest risk”

Supplement: MOESM2 [file 9546996]
